# Supplementary material
Source: PubMed Central journal article supplement (PMC4413313)
Supplement: pnas.201504944SI.pdf [file pnas.201504944SI.pdf]

# Supporting Information

Maneix et al. 10.1073/pnas.1504944112

## SI Materials and Methods

**Generation of ER $\beta$ -Floxed and ER $\beta$ - $\Delta$ ex3 Mice.** A genomic P1 clone from the mouse ER $\beta$  locus was isolated from a 129/SvJ library by Incyte Genomics using primers corresponding to exon 3. A 12-kb KpnI fragment from this clone was subcloned into pBS-KS (Stratagene) and used to make the targeting construct. Briefly, a loxP site was cloned into the BamHI site 5' of exon 3 and a fragment containing a loxP flanked neocassette, from the plasmid pL2-neo, was cloned into the BamHI site 3' of exon 3. A TK cassette was cloned into the Sall site 5' of exon 2. The targeting construct was linearized by NotI and electroporated into RW-4 129SvJ embryonic stem (ES) cells and selected with geneticin (G418) and ganciclovir on embryonic fibroblast feeder cells. Resistant clones were isolated and analyzed for homologous recombination by Southern blot analysis after KpnI digestion with a 5' external probe (KpnI/Sall fragment) as illustrated in Fig. S1A. The neo selection marker was deleted by partial Cre-mediated recombination in ES clones to generate ES clones with a "floxed" allele of ER $\beta$ . One clone in which partial Cre-recombination had occurred was injected into C57BL/6J blastocysts that were implanted into pseudopregnant females. Chimeric male mice were bred to C57BL/6J females and germ line transmission of the targeted allele was examined in the agouti offspring by Southern blot, PCR analysis (Fig. S1B) and sequence determination of the PCR products (data not shown). The name of the generated heterozygous floxed ER $\beta$  mouse line according to the Institute for Laboratory Animal Research (ILAR) nomenclature is B6.129  $\times$  1-Esr2<sup>tm1.1Gust</sup>. Mice with a deleted ER $\beta$  allele were generated by crossing ER $\beta$ <sup>lox/+</sup> with transgenic CMV-Cre deleter or Rosa-Cre deleter mice (Taconic) as described previously (1, 2). Correct recombination and deletion of exon 3 in the offspring was confirmed by PCR (Fig. S1C) and sequence determination of the PCR products (data not shown). After backcrossing into C57BL/6J mice, mice that lacked both exon 3 and the Cre transgene were selected for maintaining the colony. ER $\beta$ - $\Delta$ ex3 mice were generated by heterozygous breeding of ER $\beta$ <sup>+/-</sup> mice. The name of the ER $\beta$ - $\Delta$ ex3 mice according to the ILAR nomenclature is B6.129  $\times$  1-Esr2<sup>tm1.1Gust</sup>. All mice analyzed in this study were on a congenic C57BL/6J genetic background, backcrossed into C57BL/6J for 10 generations or more. Animals were maintained on a 14-h light, 10-h dark cycle and given a continuous supply of standard mouse chow and water. The animal studies were approved by the Stockholm South ethical review board and the local Animal Experimentation Ethics Committee for animal experimentation (University of Houston animal protocol 09-036).

**Original ER $\beta$ <sup>-/-</sup> Mice (Smithies ER $\beta$ <sup>-/-</sup>).** The original ER $\beta$ <sup>-/-</sup> mice were generated as previously described (3).

**Genotyping of Mice.** DNA from tail or ear biopsies were used as templates in PCR reactions using primers P3 (ISP: 5'-AAAG-GTATGCTTATGTCGGTGGG-3') and P4 (BIASP: 5'-GTGGATGCCTATGATCACTGTGGA-3'), which detect the WT allele as a 160-bp product and the floxed allele as 300 bp, whereas primers P1 (B1-2SP: 5'-ATCAGCCCATGGGCAGAGTGTG-3'), P2 (CIASP: 5'-CCAGATGCATAATCACTGCAGACG-3'), and P4 were used to detect the WT (size: 984 bp and 423 bp) and deleted (size: 195 bp) alleles. Presence of Cre was assayed with primers Cre-sense: 5'-CCAATTTACTGACCGTACACC-3' and Cre-antisense: 5'-GTTTCACTATCCAGGTTACGG-3'.

**RNA Isolation, RT-PCR, and DNA Sequencing.** Ovaries and ventral prostate were freshly collected and RNA was isolated using an E.Z.N.A. kit (Omega Bio-Tek) or Qiagen RNeasy mini kit, respectively. Ovary cDNA was synthesized using random hexamers and SuperScript II reverse transcriptase (Invitrogen), whereas ventral prostate cDNA was obtained using M-MLV reverse-transcriptase (Invitrogen) and oligo dT (Integrative DNA Technologies, IDT). PCR was done with high-fidelity Taq DNA polymerase (Fermentas) with the following primers: ER $\beta$ -5': 5'-GCCAATCATCGCTTC-TCTAT-3' (exon 2) with mER $\beta$  exon5R: 5'-GGCACTTCTCTGT-CTTCGTA-3' or ESR2R1: 5'-AGTGGTCTAGAAGACACCAT-3' (exon 9). PCR products were cloned by TA cloning using pGEM-T Easy vector (Promega) and sequenced at MacroGen (Ovary cDNA) or Lone Star Labs (VP cDNA).

**Morphologic Classification of Growing Follicles and Corpora Lutea.** Four ER $\beta$ - $\Delta$ ex3 mice and six WT female mice at 7–8 mo old were photographed and analyzed. Whole ovaries were embedded in paraffin and cut in 4- $\mu$ m thicknesses. Sections were taken at intervals of 40  $\mu$ m and mounted on slides. Routine hematoxylin and eosin staining was performed for histological examination under a light microscope. The proportion of follicles and corpora lutea from all obtained sections was evaluated. Follicle types in ovarian cross-sections were defined as previously described (3, 4).

**Tissue Preparation.** Mice were killed by CO<sub>2</sub> asphyxiation. The prostates, lungs, and ovaries were collected, and the ventral lobe of the prostate was separated from dorsal, anterior, and lateral lobes under a dissecting microscope. For immunohistochemical studies, tissues were fixed in 4% (wt/vol) paraformaldehyde for 24 h and embedded in paraffin using a Tissue Processor Excelsior processing machine (Fisher Scientific). For protein studies, tissues were snap frozen in liquid nitrogen and kept at -80 °C for further analysis.

**Protein Extraction.** For preparation of the whole cell extracts, ventral prostates were kept on ice and homogenized in 1 $\times$  PBS containing protease inhibitors (Complete Protease Inhibitor Mixture, Roche), PMSF 2 mM, and Na<sub>3</sub>VO<sub>4</sub> 1 mM using a tissue lyser Polytron PT 1200 E (Kinematica). Homogenates were centrifuged at 13,400  $\times$  g for 30 min at 4 °C and protein content of the supernatant was determined by Bradford assay in a Victor X4 multilabel spectrophotometer (Perkin-Elmer). For preparation of the nuclear extracts, prostates were homogenized in hypotonic buffer (Hepes 10 mM, pH 7.9; Nonidet P-40 0.1%; MgCl<sub>2</sub> 1.5 mM; KCl 10 mM; EGTA 1 mM and EDTA 1 mM, pH 8) containing protease inhibitors, DTT 0.05 mM and PMSF 0.4 mM and incubated for 40 min on ice. Cellular homogenates were centrifuged at 3,100  $\times$  g for 4 min at 4 °C and nuclear pellet was resuspended in hypertonic buffer [Hepes 20 mM, pH 7.9; glycerol 25% (vol/vol); MgCl<sub>2</sub> 1 mM; NaCl 420 mM and EDTA 0.2 mM] supplemented with protease inhibitors, DTT 0.05 mM and PMSF 0.4 mM and incubated for 1 h on ice. Nuclear homogenates were finally centrifuged at 16,100  $\times$  g for 4 min at 4 °C and protein content of the supernatant was assayed by Bradford assay. Protein extracts were stored at -80 °C.

**In Vitro Translation.** ER $\beta$  cDNA from WT (WT-ER $\beta$ ), WT-INS (WT-ER $\beta$ INS), or mutant (ER $\beta$ - $\Delta$ ex3) mouse ovaries were used as template in PCR reactions and cloned into a pGEM-T Easy expression vector (Promega). ER $\beta$  INS domain corresponds to the insertion of 18 additional amino acids in position 364 of ER $\beta$  amino acid sequence. Plasmids were prepared, sequenced, and

used to perform in vitro translations with SP6 RNA polymerase. cDNAs to be transcribed and translated were added as plasmid DNAs to a coupled transcription translation rabbit reticulocyte lysate (TnT Quick Coupled Transcription/Translation System, Promega) according to the manufacturer's instructions. Transcription required SP6 RNA polymerase and was carried out in the presence of 2  $\mu$ L of Transcend Biotin-Lysyl-tRNA (Promega). Transcription/translation reactions were performed for 60 min at 30 °C after which time equal amounts of labeled reticulocyte lysates were resolved on a 4–20% gradient SDS polyacrylamide gel. Translation products were visualized with the Transcend Non-Radioactive Translation Detection Systems kit (Promega), according to the manufacturer's instructions.

**Immunofluorescence.** Five-micrometer paraffin-embedded sections were dewaxed in xylene, rehydrated, and processed for antigen retrieval with 10 mM citrate buffer (pH 6.0) for 10 (caveolin-1 staining) or 15 min (DACH-1 staining) in a Lab Vision PT module (Thermo Scientific). Then, the cooled sections were rinsed with 1 $\times$  PBS and tissues were permeabilized with 0.5% Triton X-100 for 30 min at room temperature (DACH-1 staining). Unspecific binding was blocked by incubating the slides in 3% (wt/vol) BSA in PBS for 1 h at 4 °C. Then, the tissues were subjected to immunofluorescence staining with a caveolin-1 antibody (1:1,000 dilution) or an anti-DACH-1 (1:600 dilution) antibody in 1% BSA with 0.1% Nonidet P-40 in PBS overnight at 4 °C. The sections were then washed with 1 $\times$  PBS three times for 5 min each and incubated with Cy3-labeled goat anti-rabbit secondary antibody (1:200 dilution) at room temperature for 2 h. For dual immunofluorescence staining, cells were incubated with anti-DACH-1 and anti-ER $\beta$  503 (1:100) antibodies overnight at 4 °C. After

washing with 1 $\times$  PBS, sections were incubated with Cy3-labeled goat anti-rabbit (1:200) and FITC-conjugated donkey anti-chicken (1:200) secondary antibodies at room temperature for 2 h. The tissue sections were counterstained with DAPI (Sigma-Aldrich), mounted with UltraCruz mounting medium (Santa Cruz Biotechnology), and examined by fluorescence microscopy (Olympus XM10 camera).

**Antibodies and Preparation of Preabsorbed Antibodies to ER $\beta$ .** The chicken polyclonal ER $\beta$  503 IgY used for immunohistochemical stainings was raised against the N-terminally truncated human ER $\beta$ 1 with dominant epitope at the N terminus of the protein and was prepared as previously described (5). The rabbit polyclonal anti-ER $\beta$ -LBD antibody was directed against the LBD of human ER $\beta$  (amino acids 320–527), and prepared as previously described (5). All anti-ER $\beta$  antibodies have been tested for their specificity for ER $\beta$ , their lack of interaction with ER $\alpha$ , and loss of signals on Western blots and immunohistochemistry after preabsorption with the antigen against which they were raised. Preabsorbed ER $\beta$ -LBD antibody was prepared by incubating ER $\beta$ -LBD antibody for 12 h at 4 °C with ER $\beta$  protein coupled to activated Sepharose (Sigma-Aldrich). The mouse monoclonal anti-ER $\beta$  N-terminal antibody was raised against amino acids 1–153 of ER $\beta$ 1 and purchased from GeneTex (GTX70174). Rabbit antiandrogen receptor (N-20, sc-816), rabbit anti-ER $\alpha$  (MC-20, sc-542), and biotinylated goat anti-chicken (sc-2430) antibodies were purchased from Santa Cruz Biotechnology. Rabbit anti-Ki67 (ab 15580) antibody was purchased from Abcam and biotinylated goat anti-rabbit antibody (656140) was from Invitrogen. Rabbit anti-DACH-1 (10914-1) antibody was purchased from Proteintech Group.

- Schwenk F, Baron U, Rajewsky K (1995) A cre-transgenic mouse strain for the ubiquitous deletion of loxP-flanked gene segments including deletion in germ cells. *Nucleic Acids Res* 23(24):5080–5081.
- Antonson P, Omoto Y, Humire P, Gustafsson JA (2012) Generation of ER $\alpha$ -floxed and knockout mice using the Cre/LoxP system. *Biochem Biophys Res Commun* 424(4):710–716.
- Krege JH, et al. (1998) Generation and reproductive phenotypes of mice lacking estrogen receptor beta. *Proc Natl Acad Sci USA* 95(26):15677–15682.
- Britt KL, et al. (2000) An age-related ovarian phenotype in mice with targeted disruption of the Cyp 19 (aromatase) gene. *Endocrinology* 141(7):2614–2623.
- Saji S, et al. (2000) Estrogen receptors alpha and beta in the rodent mammary gland. *Proc Natl Acad Sci USA* 97(1):337–342.

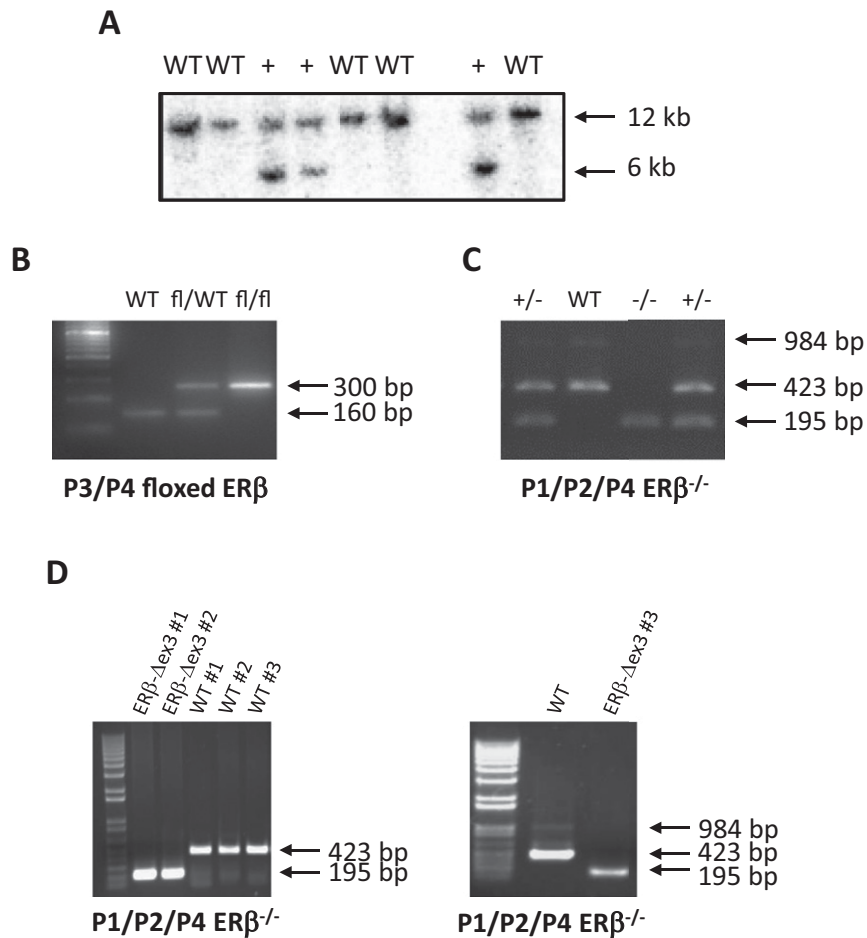

**Fig. S1.** Targeted disruption of the mouse  $ER\beta$  gene. Resistant clones (+) were analyzed for homologous recombination by Southern blot analysis after  $KpnI$  digestion with a 5' external probe ( $KpnI/Sall$  fragment). The WT allele produces a 12 kb after  $KpnI$  digestion, whereas the targeted allele generates a 6-kb band (A). Germ-line transmission of the targeted allele was examined by PCR genotyping of mouse DNA using primers P3 and P4 after partial Cre-mediated recombination (B). The top band represents the  $ER\beta$  floxed allele (300 bp) and the bottom band the WT allele (160 bp). PCR genotyping after complete Cre recombination was performed using P1, P2 and P4 primers to check correct recombination and removal of exon 3 in the offspring (C). The top bands represent the WT allele (984 bp and 423 bp) and the bottom band the deleted allele (195 bp). PCR genotyping after complete Cre recombination for the  $ER\beta$ - $\Delta ex3$  mice used for protein analysis presented in Fig. 3 is shown in (D). These  $ER\beta$ - $\Delta ex3$  mice are  $ER\beta$  homozygous knockouts.

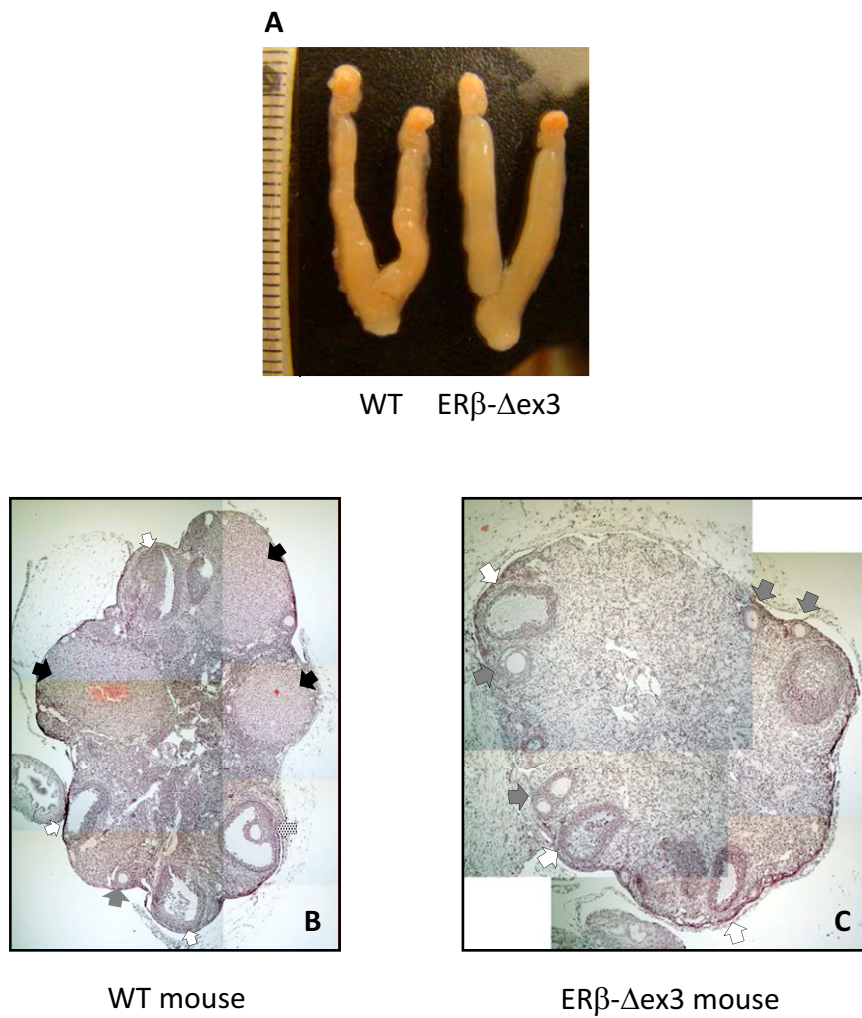

**Fig. S2.** Morphologic classification of growing follicles and corpora lutea in WT and ER $\beta$ - $\Delta$ ex3 ovaries. 7- to 8-mo-old ovary and uterus were collected and photographed (A). Ovarian cross-sections were stained with H&E and analyzed under light microscope. Growing follicles and corpora lutea were classified as described under Supplemental Materials and Methods. In WT mouse (B), there were many corpora lutea (black arrow) and follicles at different stages of growth. Healthy early antral follicles (gray arrow), healthy preovulatory follicles (dotted arrow), and atretic follicles (white arrow) are present. In the ER $\beta$ - $\Delta$ ex3 infertile mouse (C), there were many preantral follicles and a few early antral follicles (gray arrow). Most late antral follicles are atretic (white arrow). There was no corpus luteum. In conclusion, ER $\beta$ - $\Delta$ ex3 mouse ovaries display more atretic follicles and less corpora lutea than WT mice. There was no significant difference in the number of developing follicles between the WT and the mutant mice.

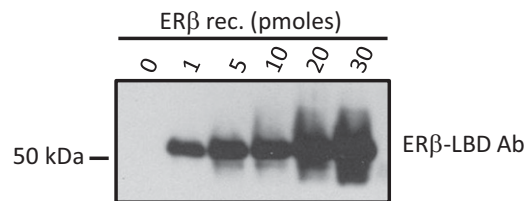

**Fig. S3.** Sensitivity of the ER $\beta$ -LBD antibody. The sensitivity of the ER $\beta$ -LBD antibody was assessed by loading increasing amounts of ER $\beta$  recombinant protein (ER $\beta$  rec.) on an SDS/PAGE and detecting it with an anti-ER $\beta$ -LBD antibody.







Original ER $\beta^{-/-}$  VP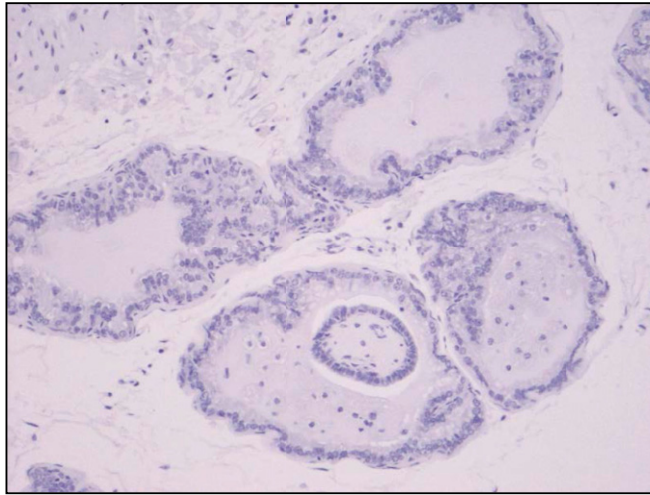Original ER $\beta^{-/-}$  VP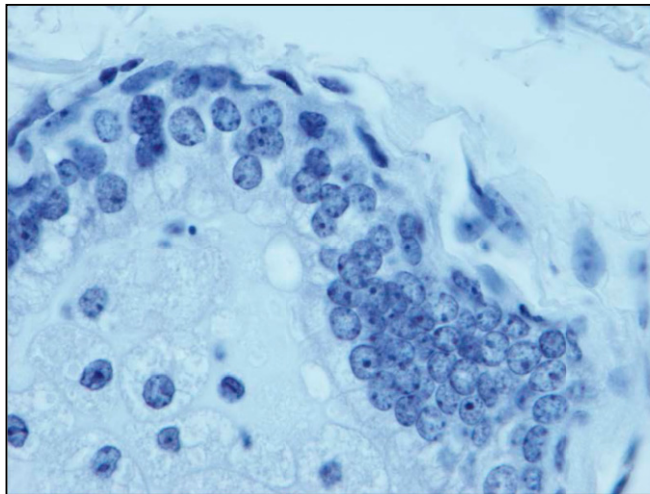

**Fig. S7.** Histological structure of original mouse ventral prostate. Representative sections of the ventral prostate collected from aged original ER $\beta^{-/-}$  mice were stained with hematoxylin. In the original ER $\beta^{-/-}$  mouse, the prostatic epithelium was disrupted and the ducts were filled with multiple layers of proliferative epithelial cells.

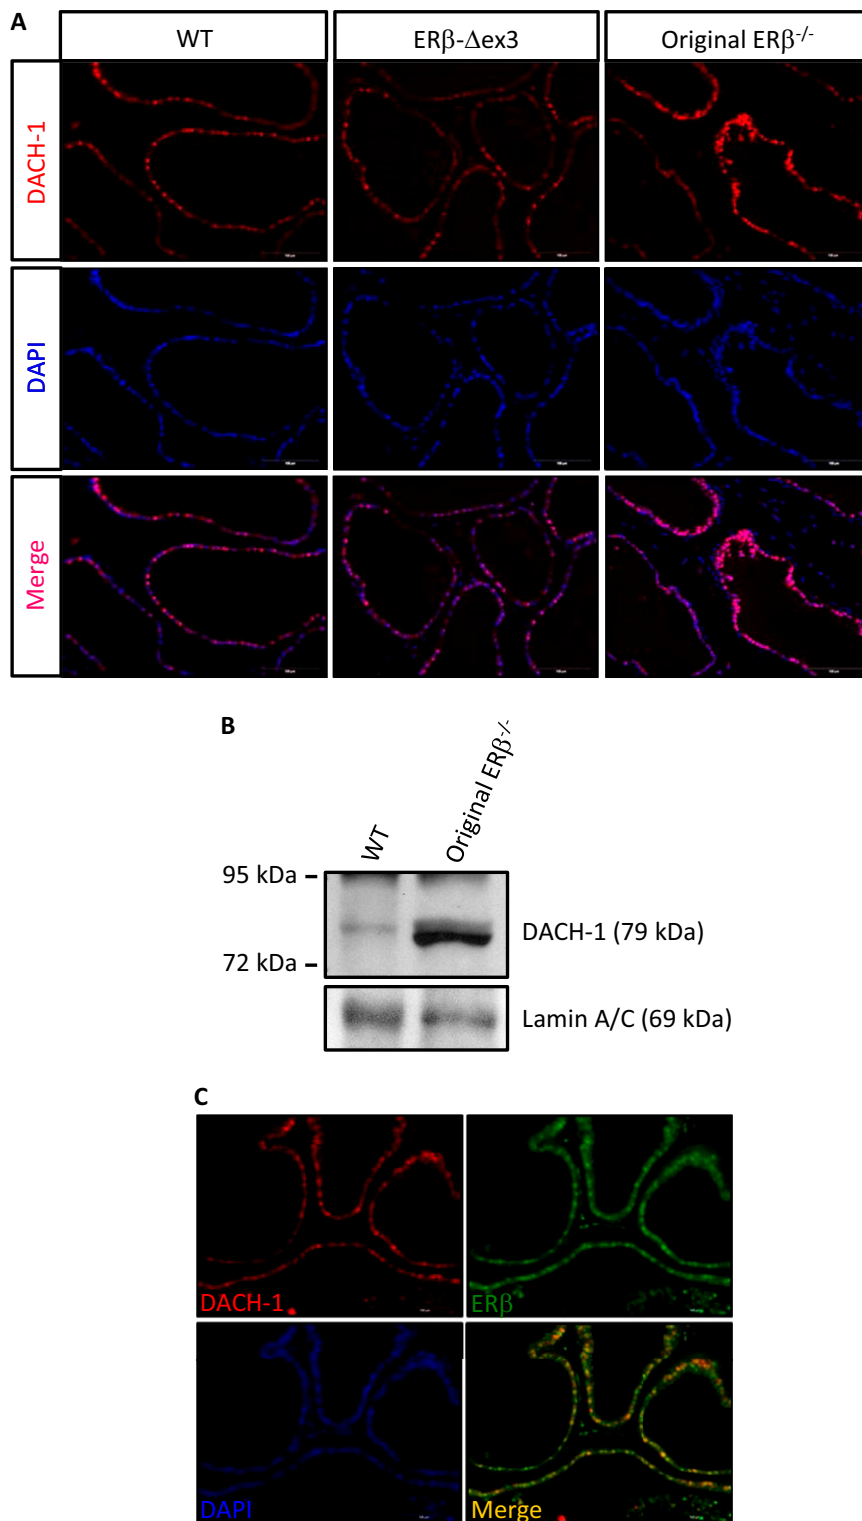

**Fig. S8.** Detection of DACH-1 and ER $\beta$  protein expression and colocalization in WT, ER $\beta$ - $\Delta$ ex3, and original ER $\beta$ <sup>-/-</sup> mouse ventral prostates by Western blot and immunofluorescence. The expression of DACH-1 was increased in the ventral prostate of 7- to 8-mo-old original ER $\beta$ <sup>-/-</sup> mice (A). In contrast, prostatic epithelium from WT and ER $\beta$ - $\Delta$ ex3 mice showed similar DACH-1 stainings. Indeed, no significant changes in the intensity or the number of positive cells were observed in the ER $\beta$ - $\Delta$ ex3 mouse ventral prostate compared with the littermate WT. DACH-1 protein was specifically expressed in the nuclei of the epithelial cells. (Scale bar, 100  $\mu$ m.) Whole cell extracts of ventral prostate of 12-mo-old (WT) or 20-mo-old mice (original ER $\beta$ <sup>-/-</sup>) were examined by Western blotting (B). Western blot analysis using DACH-1 antibody shows that DACH-1 expression is increased in the original ER $\beta$ <sup>-/-</sup> mouse ventral prostate extracts. The 7-mo-old WT ventral prostates were processed for double immunofluorescence, using anti-DACH-1 and anti-ER $\beta$ 503 antibodies (C). Representative fluorescent images of ventral prostate stained with anti-DACH-1 antibody (red) and anti-ER $\beta$  (green) are shown. DAPI indicating cell nuclei is shown in blue. Merge panel represents overlapping images of DACH-1 and ER $\beta$  panels. Results show that DACH-1 and ER $\beta$  colocalize in the nuclei of the prostatic epithelium. (Scale bar, 100  $\mu$ m.)
